# Supplementary material
Source: HighWire-hosted journal article supplement (https://jaha.ahajournals.org/content/6/3/e004344)
Supplement: inline-supplementary-material-1 [file inline-supplementary-material-1.pdf]

# **SUPPLEMENTAL MATERIAL**

**Table S1. Cross-sectional Association of Continuous Femoral Neck BMD  
with Baseline Characteristics of Study Cohort**

| Characteristics                    | Femoral Neck BMD |                         |                 |         |             |                         |                 |         |
|------------------------------------|------------------|-------------------------|-----------------|---------|-------------|-------------------------|-----------------|---------|
|                                    | Women (n=734)    |                         |                 |         | Men (n=516) |                         |                 |         |
|                                    | n                | Correlation coefficient | mean $\pm$ SD   | p value | n           | Correlation coefficient | mean $\pm$ SD   | p value |
| Age, years                         | 734              | -0.29                   |                 | <0.001  | 516         | -0.20                   |                 | <0.001  |
| Body mass index, kg/m <sup>2</sup> | 734              | 0.47                    |                 | <0.001  | 516         | 0.31                    |                 | <0.001  |
| Waist circumference, cm            | 731              | 0.41                    |                 | <0.001  | 516         | 0.19                    |                 | <0.001  |
| Systolic blood pressure, mmHg      | 734              | 0.02                    |                 | 0.632   | 516         | 0.02                    |                 | 0.661   |
| Anti-hypertensive medication       |                  |                         |                 |         |             |                         |                 |         |
| No                                 | 367              |                         | 0.63 $\pm$ 0.12 | <0.001  | 252         |                         | 0.79 $\pm$ 0.14 | 0.749   |
| Yes                                | 367              |                         | 0.66 $\pm$ 0.13 |         | 264         |                         | 0.78 $\pm$ 0.15 |         |
| Diabetes                           |                  |                         |                 |         |             |                         |                 |         |
| No                                 | 646              |                         | 0.64 $\pm$ 0.12 | <0.001  | 426         |                         | 0.77 $\pm$ 0.14 | 0.006   |

|                                             |     |       |                |       |     |      |                |       |
|---------------------------------------------|-----|-------|----------------|-------|-----|------|----------------|-------|
| Yes                                         | 88  |       | 0.72 ±<br>0.14 |       | 90  |      | 0.82 ±<br>0.16 |       |
| Smoker                                      |     |       |                |       |     |      |                |       |
| Never Smoker                                | 367 |       | 0.64 ±<br>0.12 | 0.269 | 136 |      | 0.78 ±<br>0.15 | 0.732 |
| Former Smoker                               | 300 |       | 0.66 ±<br>0.13 |       | 339 |      | 0.78 ±<br>0.14 |       |
| Current Smoker                              | 67  |       | 0.64 ±<br>0.11 |       | 41  |      | 0.79 ±<br>0.13 |       |
| Alcohol, drinks/week                        | 734 | 0.02  |                | 0.638 | 516 | 0.12 |                | 0.015 |
| Physical Activity<br>(kcal/week)*           | 734 | 0.004 |                | 0.921 | 516 | 0.07 |                | 0.105 |
| Low-density<br>lipoprotein (LDL),<br>mg/dl  | 726 | -0.01 |                | 0.769 | 509 | 0.02 |                | 0.642 |
| High-density<br>lipoprotein (HDL),<br>mg/dl | 733 | -0.03 |                | 0.494 | 516 | 0.01 |                | 0.836 |
| Triglycerides, mg/dl                        | 734 | 0.07  |                | 0.062 | 516 | 0.05 |                | 0.238 |
| Lipid-lowering<br>medication                |     |       |                |       |     |      |                |       |
| No                                          | 651 |       | 0.65 ±<br>0.12 | 0.765 | 476 |      | 0.78 ±<br>0.15 | 0.587 |

|                                  |     |  |                |       |     |  |                |       |
|----------------------------------|-----|--|----------------|-------|-----|--|----------------|-------|
| Yes                              | 83  |  | 0.64 ±<br>0.12 |       | 40  |  | 0.77 ±<br>0.16 |       |
| Aspirin                          |     |  |                |       |     |  |                |       |
| No                               | 454 |  | 0.65 ±<br>0.12 | 0.465 | 302 |  | 0.79 ±<br>0.14 | 0.588 |
| Yes                              | 277 |  | 0.64 ±<br>0.12 |       | 212 |  | 0.78 ±<br>0.15 |       |
| Digitalis                        |     |  |                |       |     |  |                |       |
| No                               | 691 |  | 0.65 ±<br>0.12 | 0.838 | 469 |  | 0.78 ±<br>0.14 | 0.266 |
| Yes                              | 43  |  | 0.65 ±<br>0.15 |       | 47  |  | 0.81 ±<br>0.17 |       |
| Estrogen Use                     |     |  |                |       |     |  |                |       |
| None                             | 597 |  | 0.64 ±<br>0.13 | 0.087 |     |  |                |       |
| Yes                              | 137 |  | 0.66 ±<br>0.12 |       |     |  |                |       |
| Prevalent coronary heart disease |     |  |                |       |     |  |                |       |
| No                               | 623 |  | 0.65 ±<br>0.12 | 0.936 | 371 |  | 0.78 ±<br>0.14 | 0.624 |
| Yes                              | 111 |  | 0.65 ±<br>0.13 |       | 145 |  | 0.78 ±<br>0.15 |       |

|                                             |     |      |                |       |     |       |                |       |
|---------------------------------------------|-----|------|----------------|-------|-----|-------|----------------|-------|
| Prevalent stroke/transient ischemic attack  |     |      |                |       |     |       |                |       |
| No                                          | 707 |      | 0.65 ±<br>0.12 | 0.897 | 469 |       | 0.79 ±<br>0.14 | 0.194 |
| Yes                                         | 27  |      | 0.64 ±<br>0.11 |       | 47  |       | 0.76 ±<br>0.16 |       |
| Prevalent peripheral arterial disease       |     |      |                |       |     |       |                |       |
| No                                          | 109 |      | 0.65 ±<br>0.14 | 0.896 | 95  |       | 0.76 ±<br>0.17 | 0.540 |
| Yes                                         | 625 |      | 0.65 ±<br>0.12 |       | 421 |       | 0.79 ±<br>0.14 |       |
| Prevalent atrial fibrillation               |     |      |                |       |     |       |                |       |
| No                                          | 696 |      | 0.65 ±<br>0.12 | 0.015 | 478 |       | 0.78 ±<br>0.15 | 0.475 |
| Yes                                         | 38  |      | 0.60 ±<br>0.13 |       | 38  |       | 0.80 ±<br>0.14 |       |
| Creatinine, mg/dl                           | 725 | 0.07 |                | 0.065 | 512 | 0.004 |                | 0.923 |
| Estimated glomerular filtration rate (eGFR, | 734 | 0.05 |                | 0.143 | 516 | 0.07  |                | 0.112 |

|                                                |     |      |  |        |     |      |  |       |
|------------------------------------------------|-----|------|--|--------|-----|------|--|-------|
| cystatin-based),<br>ml/min/1.73 m <sup>2</sup> |     |      |  |        |     |      |  |       |
| Forced expiratory<br>volume in 1 second,<br>l  | 734 | 0.10 |  | 0.010  | 516 | 0.07 |  | 0.125 |
| C-reactive protein,<br>mg/l                    | 734 | 0.13 |  | <0.001 | 516 | 0.05 |  | 0.272 |

\*The logarithm of physical activity + 1 was used to compute the correlation

BMD: bone mineral density
